# Supplementary material for: Integrative and Comprehensive Pancancer Analysis of Regulator of Chromatin Condensation 1 (RCC1)
Source: MDPI journal article supplement (doi:10.3390/ijms22147374), 2021-07-09
Supplement: s1 [file s1]

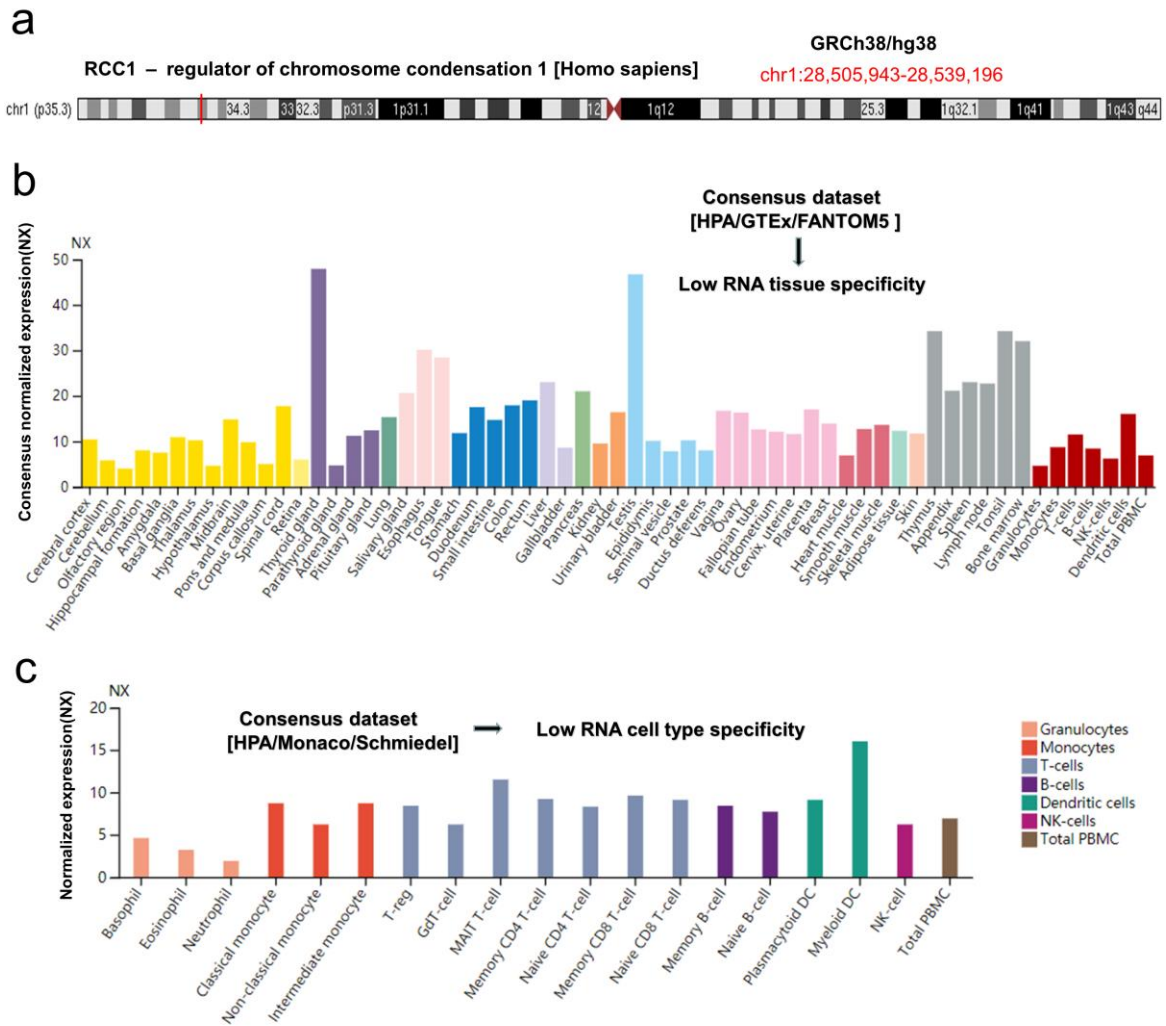

**Supplementary Figure S1. Expression level of RCC1 in different normal tissues and blood cells.** (a) Genomic location of human RCC1. (b) RCC1 gene in different normal tissues using the consensus datasets of HPA, GTEx and FANTOM5. (c) RCC1 gene in different normal blood cells using the consensus datasets of HPA, Monaco and Schmiedel.

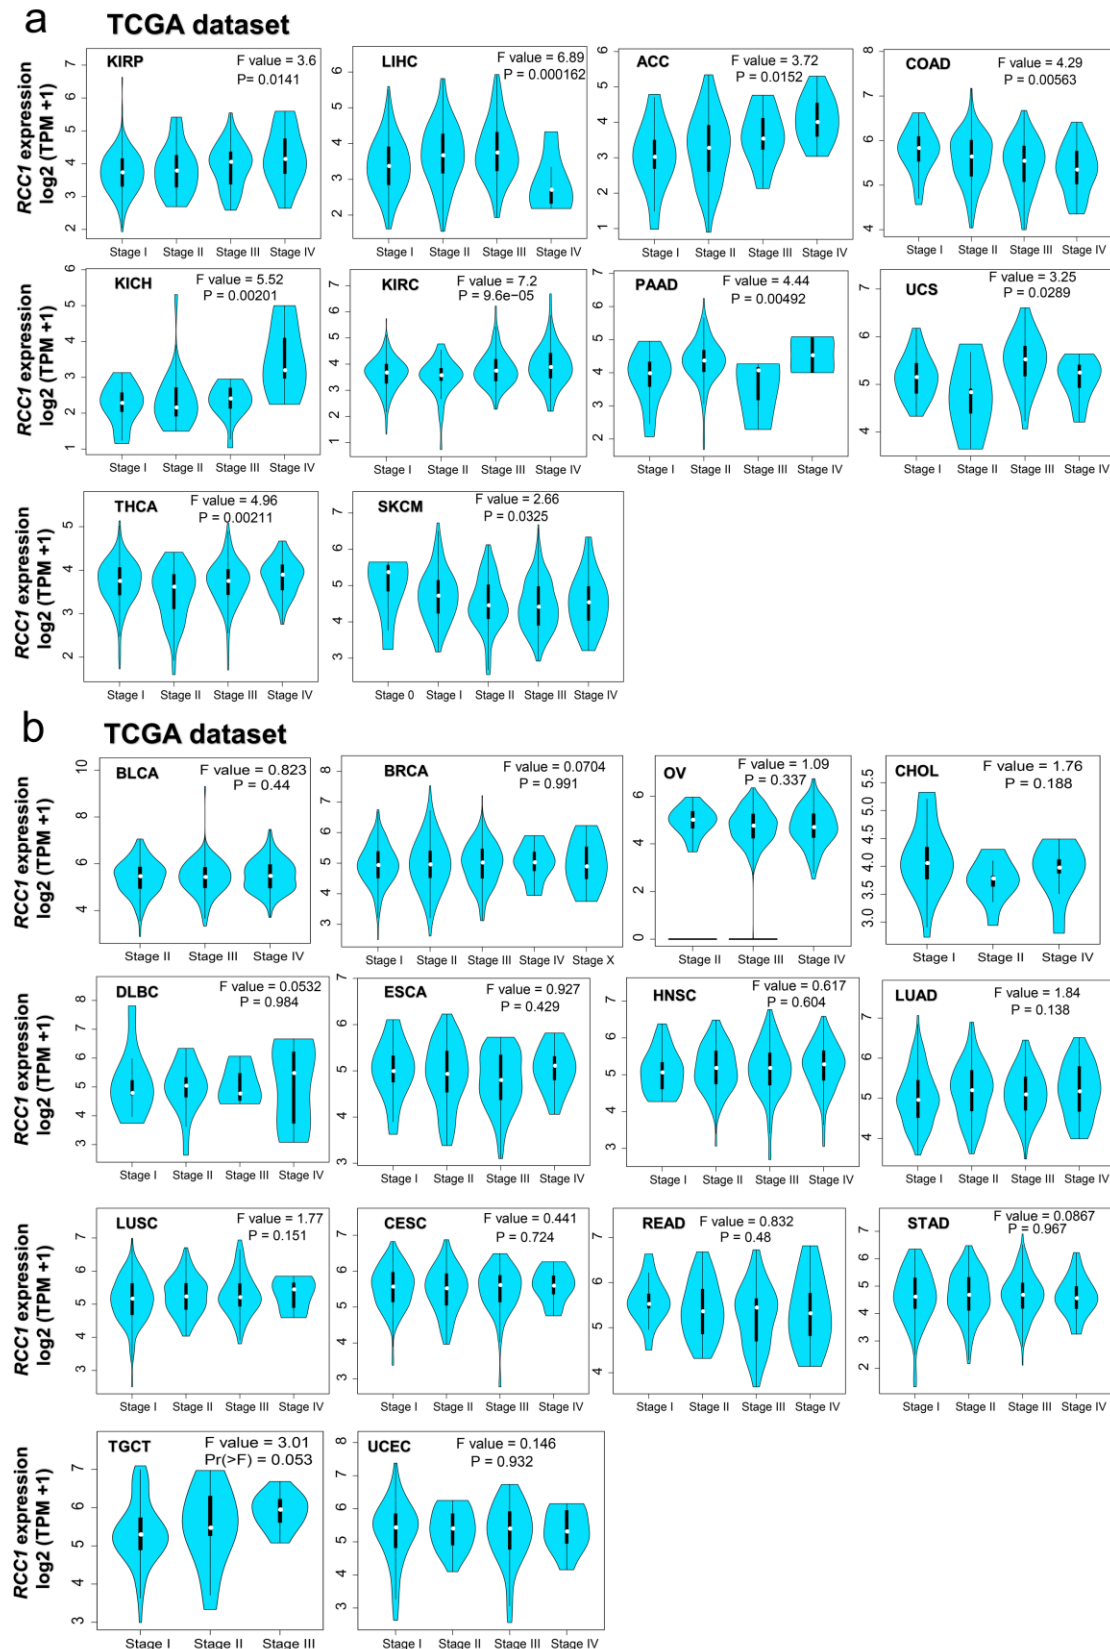

**Supplementary Figure S2. The correlation between RCC1 expression and main pathological stages in TCGA dataset.** (a) The expression of RCC1 gene were analyzed by the main pathological stages of KIRP, LIHC, ACC, COAD, KICH, KIRC,

PAAD, UCS, THCA and SKCM in TCGA dataset. (b) Expression levels of the RCC1 gene by different pathological stages of BLCA, BRCA, OV, CHOL, DLBC, ESCA, HNSC, LUAD, LUSC, CESC, READ, STAD, TGCT and UCEC.

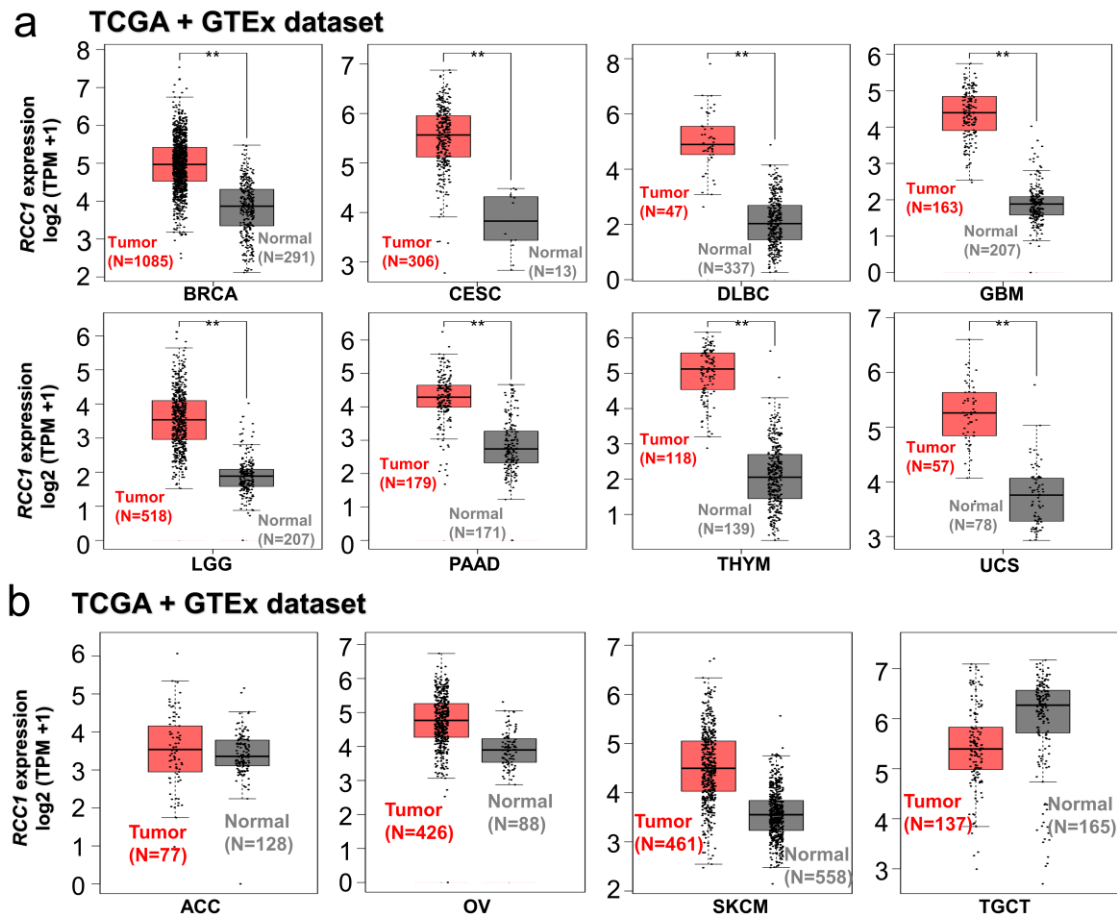

**Supplementary Figure S3. Expression level of RCC1 gene in different tumors based on the combination of TCGA and GTEx datasets.** (a) The expression of RCC1 in BRCA, CESC, DLBC, GBM, LGG, PAAD, THYM and UCS based on the combination of TCGA and GTEx datasets. \*\*  $P < 0.01$ . (b) The expression of RCC1 in ACC, OV, SKCM and TGCT based on the combination of TCGA and GTEx datasets.

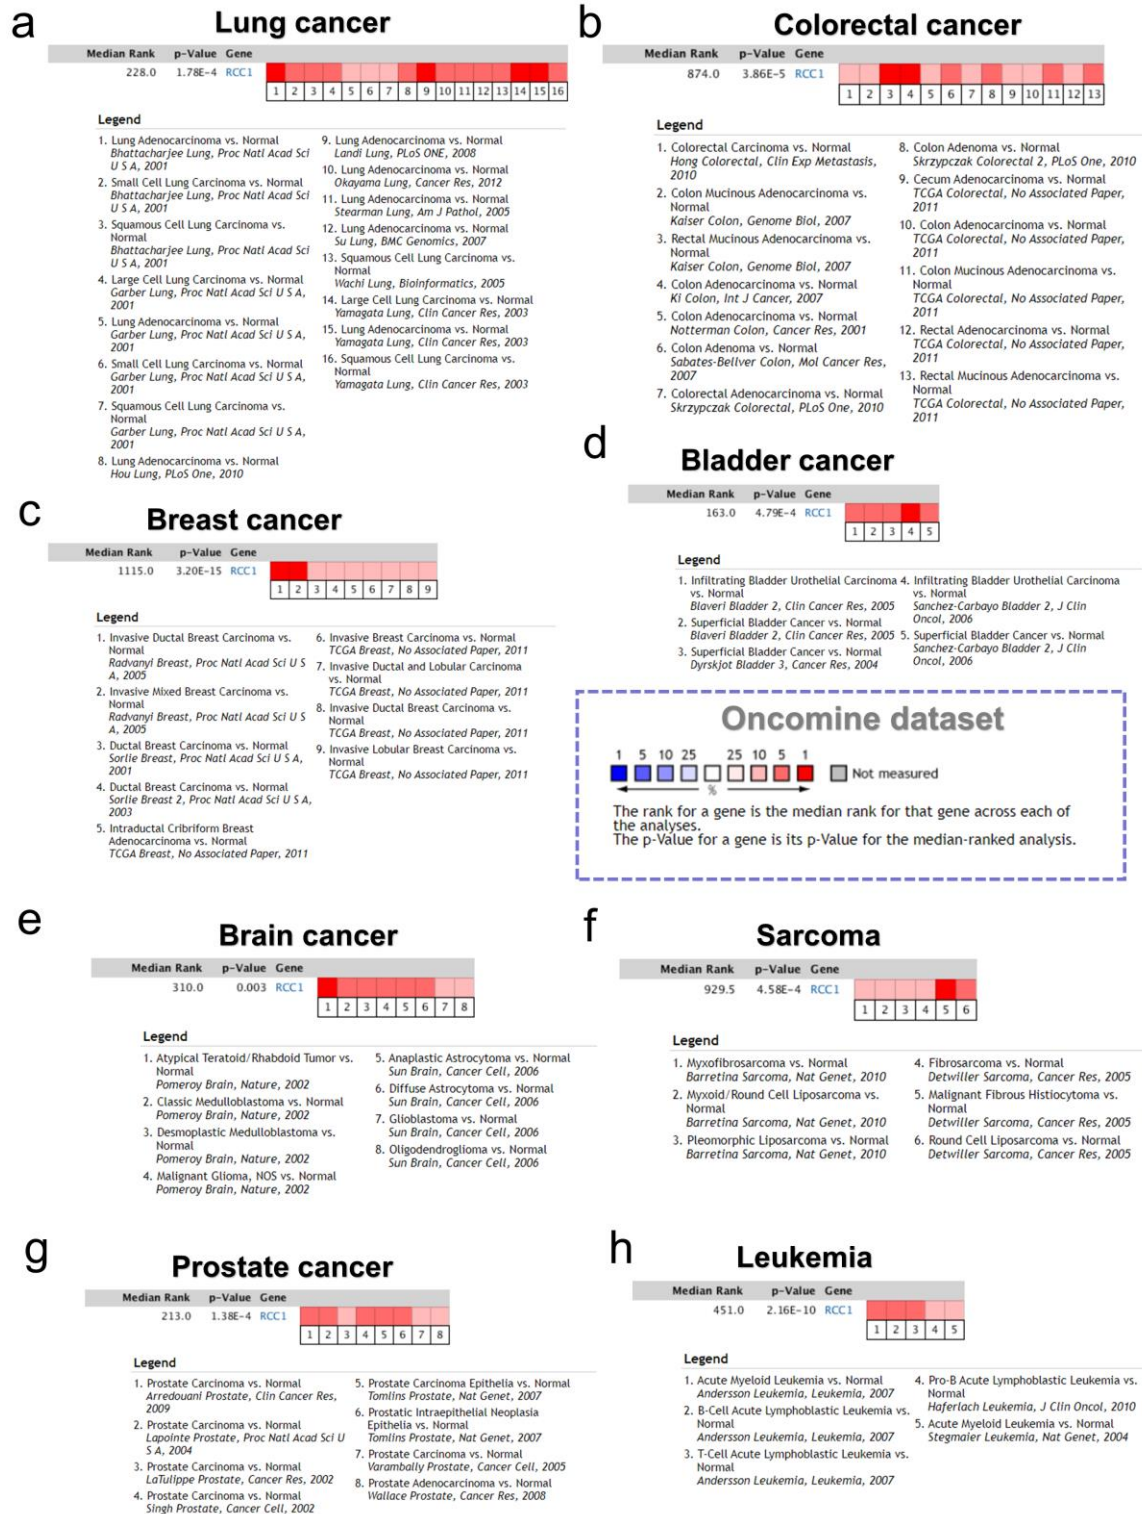

**Supplementary Figure S4. Pooled analysis on the RCC1 expression difference between normal and tumor tissues via the Oncomine database. (a) Lung cancer; (b) Colorectal cancer; (c) Breast cancer; (d) Bladder cancer; (e) Brain cancer; (f) Sarcoma; (g) Prostate cancer; (h) Leukemia.**

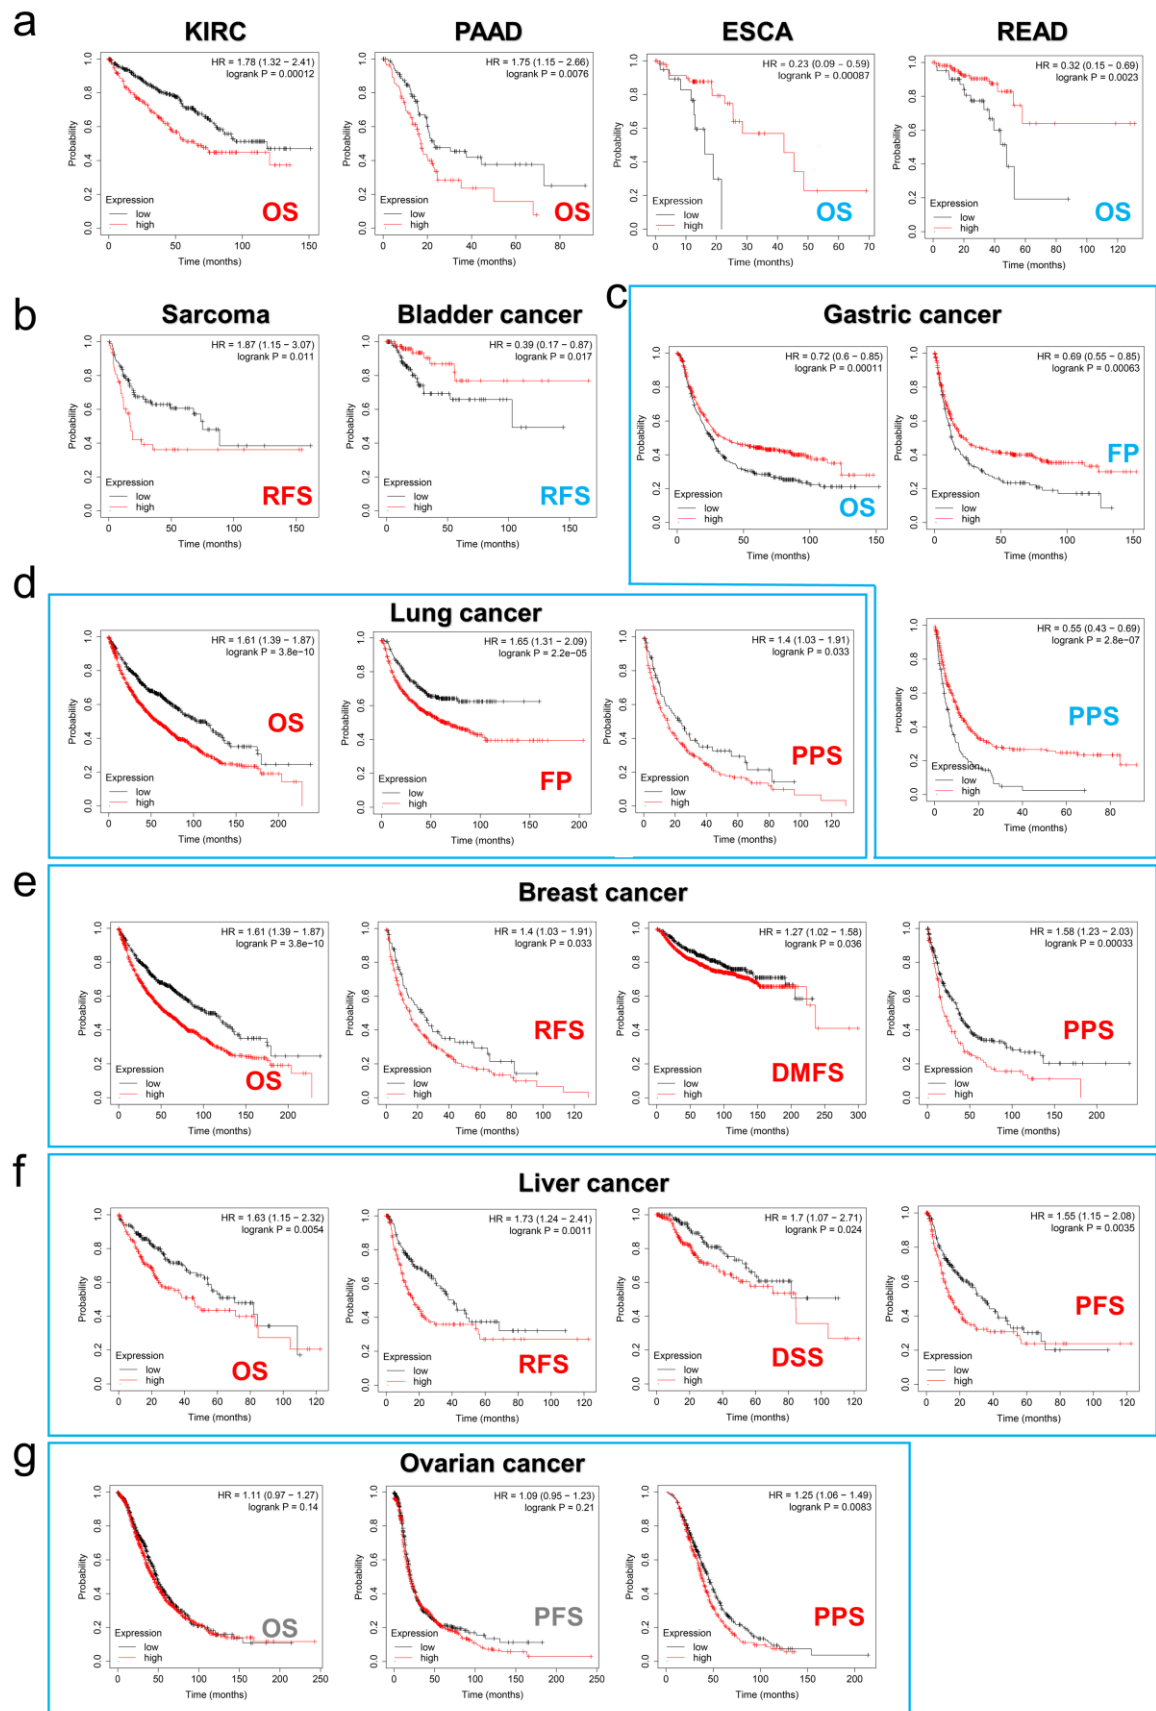

**Supplementary Figure S5. Correlation between RCC1 gene expression and prognosis of different tumors based on the Kaplan-Meier plotter. (a) KIRC, PAAD,**

ESCA and READ; (b) Sarcoma and bladder cancer; (c) Gastric cancer; (d) Lung cancer; (e) Breast cancer; (f) Liver cancer; (g) Ovarian cancer.

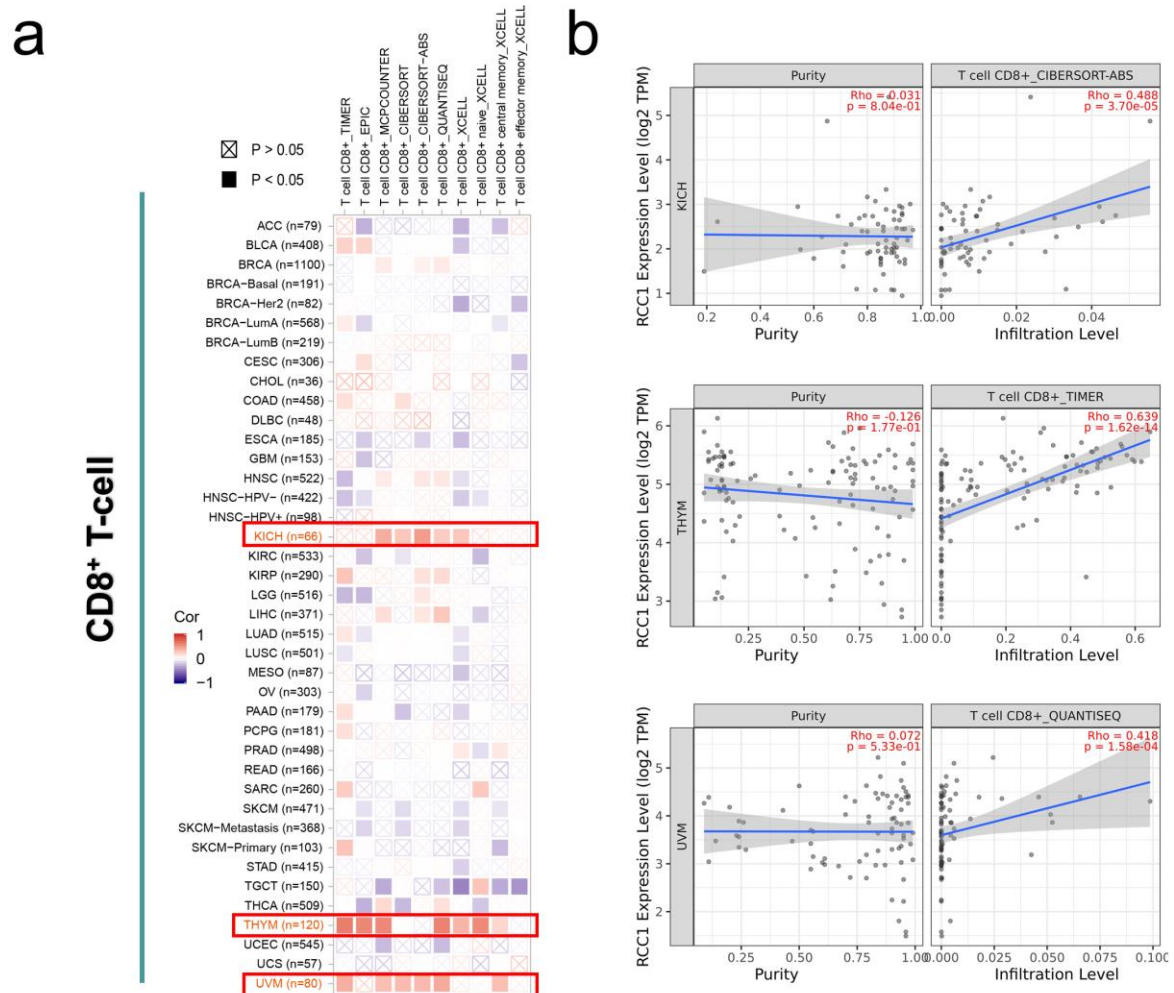

**Supplementary Figure S6. Association between RCC1 expression and immune infiltration of CD8<sup>+</sup> T cells in different tumors. The scatter plots of CD8<sup>+</sup> T cells immune infiltration in different tumors were generated based on a certain algorithm.**

a

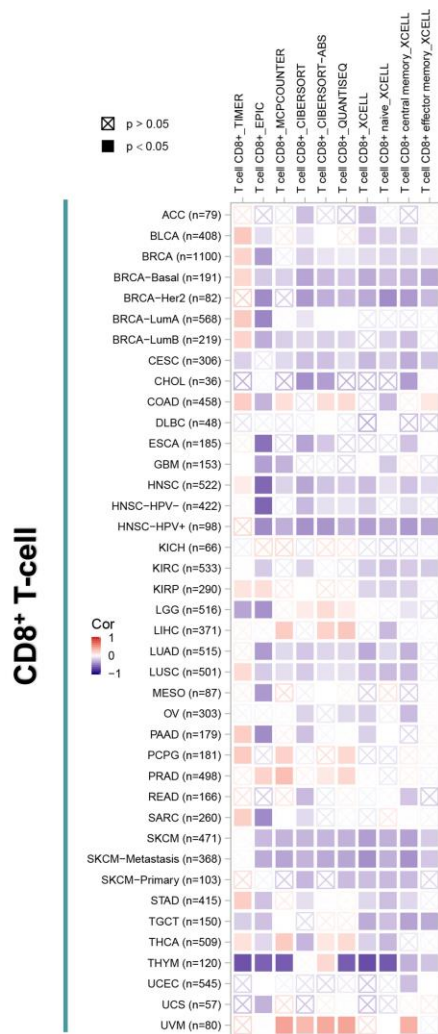

b

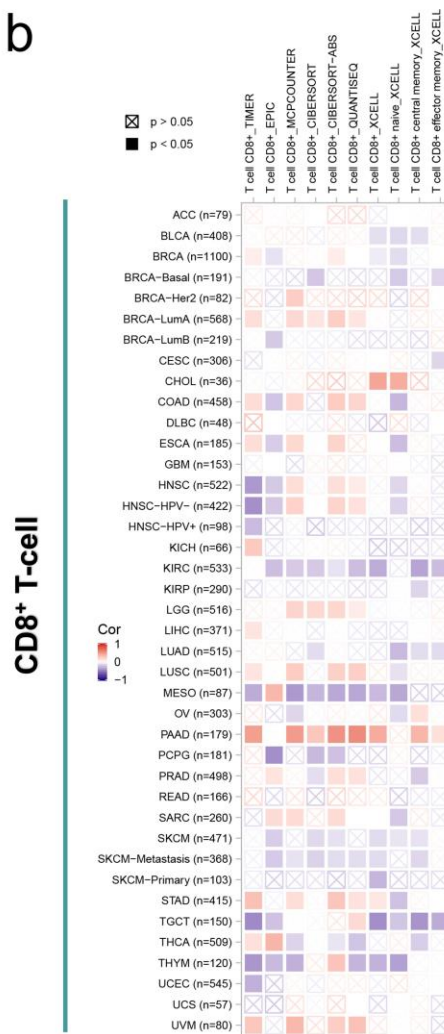

**Supplementary Figure S7. Association between CD276 (a) and NRP1 (b) expression and immune infiltration of CD8<sup>+</sup> T cells in different tumors.**

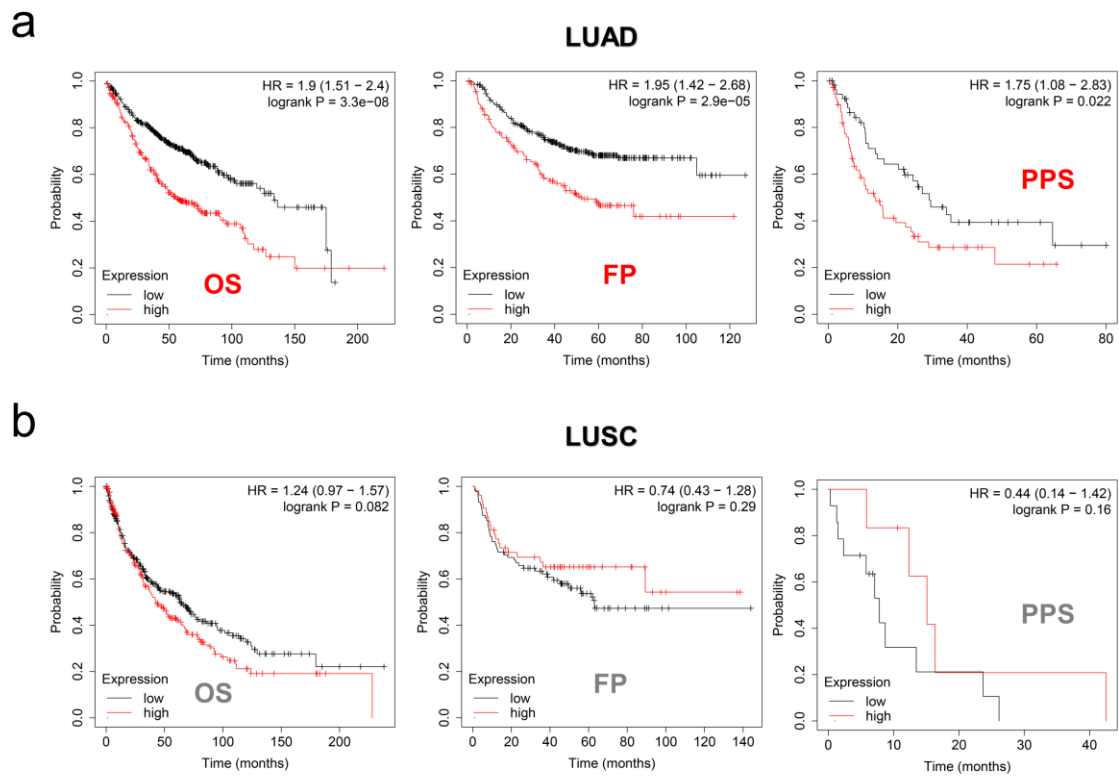

**Supplementary Figure S8. Correlation between RCC1 gene expression and prognosis of LUAD/LUSC based on the Kaplan-Meier plotter.**

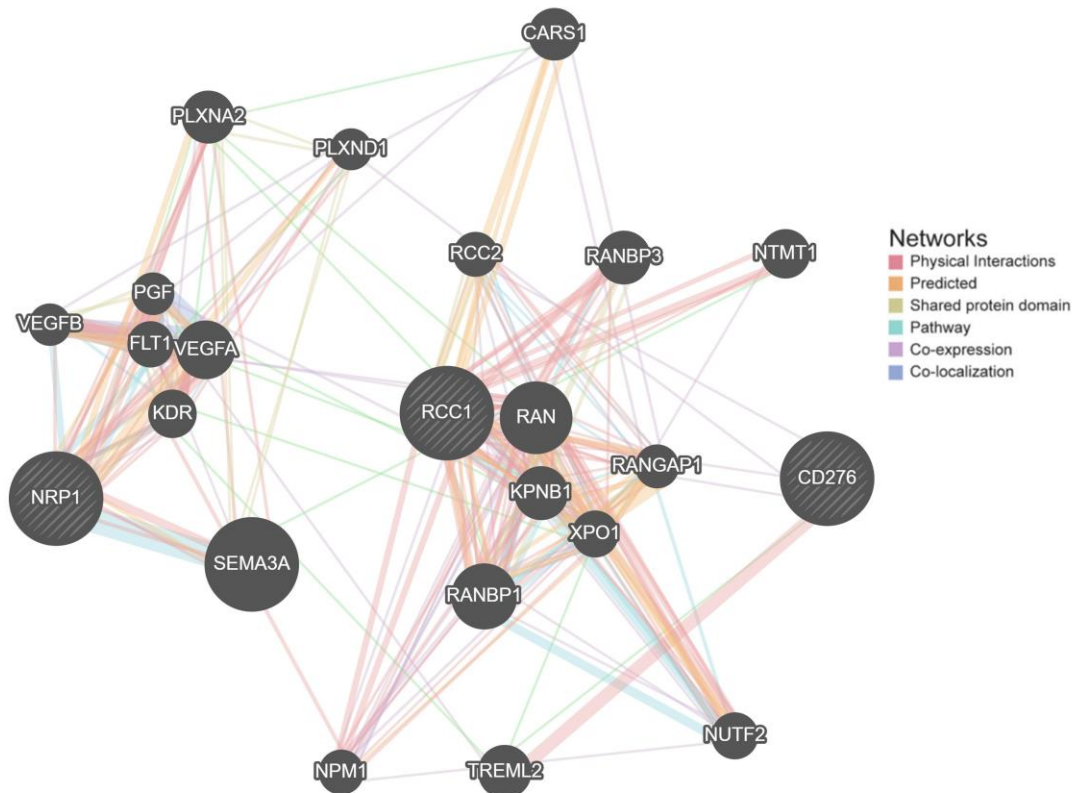

**Supplementary Figure S9. Network of RCC1, CD276 and NRP1 was analyzed by GeneMANIA.**

**Supplementary Table S2. Correlation of RCC1 gene expression with RCC1 DNA methylation in multiple probes of different tumors.**

| Tumor Type | Promoter Region | Non-Promoter Region |
|------------|-----------------|---------------------|
| BLCA       | NC              | NC                  |
| BRCA       | NC              | NC                  |
| CESC       | NC&PC           | NC&PC               |
| CHOL       | No correlation  | NC                  |
| COAD       | NC              | NC&PC               |
| DLBC       | NC              | NC&PC               |
| ESCA       | NC              | NC&PC               |
| GBM        | No correlation  | NC&PC               |
| HNSC       | No correlation  | NC&PC               |
| KICH       | No correlation  | NC                  |
| KIRC       | No correlation  | NC                  |
| KIRP       | No correlation  | NC&PC               |
| LAML       | No correlation  | NC&PC               |

|      |                |       |
|------|----------------|-------|
| LGG  | NC&PC          | NC&PC |
| LIHC | NC             | NC    |
| LUAD | NC             | NC    |
| LUSC | No correlation | NC&PC |
| MESO | NC             | NC    |
| OV   | NC             | NC    |
| PAAD | No correlation | NC    |
| PCPG | NC             | NC&PC |
| PRAD | No correlation | NC&PC |
| READ | NC             | NC    |
| SARC | NC             | NC&PC |
| SKCM | NC             | NC&PC |
| STAD | No correlation | NC&PC |
| TGCT | NC             | NC&PC |
| THCA | NC             | NC&PC |
| THYM | No correlation | NC&PC |
| UCEC | NC&PC          | NC&PC |
| UVM  | NC             | NC&PC |

NC, Negative correlation; PC, Positive correlation; BLCA, Bladder Urothelial Carcinoma; BRCA, Breast invasive carcinoma; CESC, Cervical squamous cell carcinoma and endocervical adenocarcinoma; CHOL, Cholangiocarcinoma; COAD, Colon adenocarcinoma; DLBC, Lymphoid Neoplasm Diffuse Large B-cell Lymphoma; ESCA, Esophageal carcinoma; GBM, Glioblastoma multiforme; HNSC, Head and Neck squamous cell carcinoma; KICH, Kidney Chromophobe; KIRC, Kidney renal clear cell carcinoma; KIRP, Kidney renal papillary cell carcinoma; LAML, Acute Myeloid Leukemia; LGG, Brain Lower Grade Glioma; LIHC, Liver hepatocellular carcinoma; LUAD, Lung adenocarcinoma; LUSC, Lung squamous cell carcinoma; MESO, Mesothelioma; OV, Ovarian serous cystadenocarcinoma; PAAD, Pancreatic adenocarcinoma; PCPG, Pheochromocytoma and Paraganglioma; PRAD, Prostate adenocarcinoma; READ, Rectum adenocarcinoma; SARC, Sarcoma; SKCM, Skin Cutaneous Melanoma; STAD, Stomach adenocarcinoma; TGCT, Testicular Germ Cell Tumors; THCA, Thyroid carcinoma; THYM, Thymoma; UCEC, Uterine Corpus Endometrial Carcinoma; UVM, Uveal Melanoma.
