# Supplementary material for: Integrative and Comprehensive Pancancer Analysis of Regulator of Chromatin Condensation 1 (RCC1)
Source: Int J Mol Sci. 2021 Jul 9;22(14):7374. doi: 10.3390/ijms22147374 (PMC8305170; doi:10.3390/ijms22147374)
Supplement: Supplementary file 1 [file ijms-22-07374-s001.zip › Supplementary Table S1.xlsx]

## Sheet: Sheet1
Regulatory of Elements (REM) in RCC1
Gene ID	Gene symbol	REM ID	Chr	REM start	REM end	Predicted function	Model score	Cluster of REMs (CREM) ID	Number of REMs in the CREM
ENSG00000180198	RCC1	REM0043318	chr1	28407803	28407942	repressing	0.646309	CREM0007475	3
ENSG00000180198	RCC1	REM0043332	chr1	28414253	28414702	activating	0.333549	No CREM	-
ENSG00000180198	RCC1	REM0043336	chr1	28416443	28416852	activating	0.628674	CREM0007481	9
ENSG00000180198	RCC1	REM0043348	chr1	28417453	28417602	activating	0.833714	CREM0007482	17
ENSG00000180198	RCC1	REM0043350	chr1	28417603	28417752	activating	0.247975	CREM0007482	17
ENSG00000180198	RCC1	REM0043353	chr1	28417753	28417942	repressing	0.534691	CREM0007482	17
ENSG00000180198	RCC1	REM0043372	chr1	28422753	28423052	repressing	0.0925458	CREM0007485	2
ENSG00000180198	RCC1	REM0043379	chr1	28426453	28426652	repressing	0.429182	CREM0007486	5
ENSG00000180198	RCC1	REM0043384	chr1	28428053	28428202	repressing	0.571986	CREM0007488	3
ENSG00000180198	RCC1	REM0043385	chr1	28428203	28428302	activating	0.295602	No CREM	-
ENSG00000180198	RCC1	REM0043386	chr1	28428303	28428452	activating	0.798453	CREM0007489	5
ENSG00000180198	RCC1	REM0043389	chr1	28428453	28428652	repressing	0.821461	CREM0007489	5
ENSG00000180198	RCC1	REM0043393	chr1	28429943	28430452	activating	0.703132	CREM0007490	3
ENSG00000180198	RCC1	REM0043398	chr1	28432203	28432952	repressing	0.903569	CREM0007491	6
ENSG00000180198	RCC1	REM0043412	chr1	28436393	28436552	repressing	0.539524	CREM0007493	2
ENSG00000180198	RCC1	REM0043428	chr1	28445943	28447452	activating	0.677436	CREM0007497	7
ENSG00000180198	RCC1	REM0043432	chr1	28447453	28447942	repressing	0.614062	CREM0007497	7
ENSG00000180198	RCC1	REM0043435	chr1	28447943	28448402	repressing	0.0731703	CREM0007498	9
ENSG00000180198	RCC1	REM0043441	chr1	28448553	28448652	activating	0.664946	CREM0007498	9
ENSG00000180198	RCC1	REM0043446	chr1	28449803	28449942	repressing	0.650021	CREM0007499	28
ENSG00000180198	RCC1	REM0043451	chr1	28449943	28450002	activating	0.0587043	CREM0007499	28
ENSG00000180198	RCC1	REM0043459	chr1	28450003	28450202	repressing	0.657781	CREM0007499	28
ENSG00000180198	RCC1	REM0043463	chr1	28450203	28450252	repressing	0.156348	CREM0007499	28
ENSG00000180198	RCC1	REM0043467	chr1	28450253	28450552	activating	0.207178	CREM0007499	28
ENSG00000180198	RCC1	REM0043471	chr1	28450553	28450852	repressing	0.425513	CREM0007499	28
ENSG00000180198	RCC1	REM0043485	chr1	28455153	28455252	activating	0.407933	CREM0007502	3
ENSG00000180198	RCC1	REM0043487	chr1	28455943	28456102	repressing	0.65623	CREM0007503	2
ENSG00000180198	RCC1	REM0043490	chr1	28456353	28456602	activating	0.0026583	CREM0007504	4
ENSG00000180198	RCC1	REM0043521	chr1	28469803	28469942	activating	0.0735868	No CREM	-
ENSG00000180198	RCC1	REM0043550	chr1	28477653	28477942	repressing	0.241199	CREM0007513	9
ENSG00000180198	RCC1	REM0043612	chr1	28492153	28492352	activating	0.369463	CREM0007522	3
ENSG00000180198	RCC1	REM0043633	chr1	28498503	28499942	activating	1	CREM0007526	16
ENSG00000180198	RCC1	REM0043652	chr1	28501093	28501352	activating	0.568769	CREM0007528	8
ENSG00000180198	RCC1	REM0043744	chr1	28513453	28513942	repressing	0.302974	CREM0007542	13
ENSG00000180198	RCC1	REM0043749	chr1	28513943	28514252	activating	0.243452	CREM0007542	13
ENSG00000180198	RCC1	REM0043754	chr1	28514553	28514752	repressing	0.529809	CREM0007542	13
ENSG00000180198	RCC1	REM0043770	chr1	28516103	28516302	activating	0.666621	CREM0007544	22
ENSG00000180198	RCC1	REM0043804	chr1	28519403	28519702	activating	0.569761	CREM0007548	7
ENSG00000180198	RCC1	REM0043806	chr1	28519703	28519942	activating	0.759286	CREM0007548	7
ENSG00000180198	RCC1	REM0043830	chr1	28525193	28525942	repressing	0.0870488	CREM0007553	28
ENSG00000180198	RCC1	REM0043838	chr1	28525943	28527942	repressing	0.631842	CREM0007553	28
ENSG00000180198	RCC1	REM0043923	chr1	28540903	28541402	repressing	0.409479	CREM0007565	3
ENSG00000180198	RCC1	REM0043935	chr1	28542903	28543192	activating	0.623057	No CREM	-
ENSG00000180198	RCC1	REM0043960	chr1	28549403	28549702	repressing	0.0514674	CREM0007569	17
ENSG00000180198	RCC1	REM0043992	chr1	28553803	28553902	activating	0.215155	CREM0007573	3
ENSG00000180198	RCC1	REM0044055	chr1	28574603	28575352	repressing	0.779648	CREM0007586	9
ENSG00000180198	RCC1	REM0044145	chr1	28590703	28591102	activating	0.65068	CREM0007606	14
ENSG00000180198	RCC1	REM0044164	chr1	28593943	28595202	repressing	0.345705	CREM0007609	16
ENSG00000180198	RCC1	REM0044228	chr1	28607753	28607942	repressing	0.553905	CREM0007614	3
ENSG00000180198	RCC1	REM0044243	chr1	28611753	28611942	activating	0.0631941	CREM0007617	6
ENSG00000180198	RCC1	REM0044245	chr1	28611943	28612402	repressing	0.0634394	CREM0007617	6
ENSG00000180198	RCC1	REM0044270	chr1	28619943	28620752	activating	0.550257	CREM0007621	7
ENSG00000180198	RCC1	REM0044289	chr1	28622603	28622892	repressing	0.164885	CREM0007625	11
ENSG00000180198	RCC1	REM0044346	chr1	28636053	28636202	activating	0.041887	CREM0007632	14
