# Supplementary material for: Integrative and Comprehensive Pancancer Analysis of Regulator of Chromatin Condensation 1 (RCC1)
Source: Int J Mol Sci. 2021 Jul 9;22(14):7374. doi: 10.3390/ijms22147374 (PMC8305170; doi:10.3390/ijms22147374)
Supplement: Supplementary file 1 [file ijms-22-07374-s001.zip › Supplementary Table S3.xlsx]

## Sheet: Sheet1
Summary of RCC1 in various tumors in this study
Tumor Type	Genetic Alternation	Gene Expression		Protein Expression	The relationship between high RCC1 expression and OS		The relationship between high RCC1 expression and DFS		The relationship between RCC1 expression and MSI	The relationship between RCC1 expression and TMB	The correlation between RCC1 expression and CAF	The correlation between RCC1 expression and CD8+ T cell infiltration
	TCGA dataset	TCGA dataset	TCGA dataset + GTEx dataset	CPTAC dataset	TCGA dataset	GEO datasets	TCGA dataset	GEO datasets	TCGA dataset	TCGA dataset	TCGA dataset	TCGA dataset
ACC	-	-	NS	-	Poor OS *	-	Poor DFS **	-	Positive correlation **	Positive correlation ***	Positive correlation	NS
BLCA	Mutation;Amplification	Upregulate ***	-	-	NS	-	NS	Better DFS *	NS	NS	NS	NS
BRCA	Mutation;Structural Variant;Amplification;Deep Deletion	-	Upregulate **	Upregulate ***	Poor OS *	Poor OS ***	NS	Poor DFS *	NS	NS	Negative correlation	NS
CHOL	Deep Deletion	Upregulate ***	-	-	NS	-	NS	-	NS	NS	NS	NS
CESC	Amplification;Deep Deletion	-	Upregulate **	-	NS	-	NS	-	NS	NS	NS	NS
COAD	Mutation;Deep Deletion	Upregulate ***	-	Upregulate ***	Better OS *	-	Better DFS *	-	Positive correlation ***	Positive correlation ***	Negative correlation	NS
DLBC	-	-	Upregulate **	-	NS	-	NS	-	NS	NS	NS	NS
ESCA	Mutation;Structural Variant;Deep Deletion	Upregulate ***	-	-	NS	Better OS ***	NS	-	NS	NS	NS	NS
GBM	Mutation;Amplification	-	Upregulate **	-	NS	-	NS	-	Positive correlation *	NS	NS	NS
HNSC	Mutation	Upregulate ***	-	-	NS	-	NS	-	NS	NS	NS	NS
KIRC	Mutation;Deep Deletion	Upregulate ***	-	Upregulate ***	NS	Poor OS ***	NS	-	NS	Positive correlation *	Positive correlation	NS
KICH	-	Downregulate ***	-	-	NS	-	Poor DFS **	-	NS	Positive correlation ***	NS	Positive correlation
KIRP	Deep Deletion	Upregulate ***	-	-	Poor OS **	-	NS	-	NS	NS	Positive correlation	NS
LIHC	Mutation;Deep Deletion	Upregulate ***	-	-	Poor OS **	Poor OS **	NS	Poor DFS **	Positive correlation *	NS	NS	NS
LUAD	Mutation;Amplification;Deep Deletion	Upregulate ***	-	Upregulate ***	Poor OS *	Poor OS ***	NS	-	NS	Positive correlation ***	NS	NS
LUSC	Mutation;Structural Variant;Deep Deletion	Upregulate ***	-	-	NS	NS	NS	-	Positive correlation ***	NS	NS	NS
LGG	Amplification	-	Upregulate **	-	Poor OS ***	-	Poor DFS ***	-	NS	NS	NS	NS
LAML	-	-	-	-	NS	-	NS	-	NS	NS	NS	NS
MESO	-	-	-	-	NS	-	NS	-	NS	NS	NS	NS
OV	Mutation;Structural Variant;Amplification;Deep Deletion	-	NS	Upregulate ***	NS	NS	NS	-	NS	NS	NS	NS
PRAD	Deep Deletion	Upregulate ***	-	-	NS	-	NS	-	NS	Positive correlation ***	NS	NS
PCPG	Deep Deletion	Downregulate **	-	-	NS	-	NS	-	NS	NS	Positive correlation	NS
PAAD	Mutation;Amplification;Deep Deletion	NS	Upregulate **	-	NS	Poor OS ***	Poor DFS *	-	NS	NS	NS	NS
READ	-	Upregulate ***	-	-	NS	Better OS ***	NS	-	NS	Positive correlation ***	NS	NS
STAD	Mutation;Amplification;Deep Deletion	Upregulate ***	-	-	NS	Better OS ***	NS	-	Positive correlation ***	Positive correlation ***	Negative correlation	NS
SARC	Mutation;Amplification;Deep Deletion	-	-	-	Poor OS **	-	NS	Poor DFS *	Positive correlation ***	NS	NS	NS
SKCM	Mutation;Structural Variant;Amplification;Deep Deletion	-	NS	-	Poor OS **	-	NS	-	NS	Positive correlation ***	NS	NS
THCA	Mutation	Upregulate ***	-	-	NS	-	NS	-	NS	NS	Positive correlation	NS
THYM	-	-	Upregulate **	-	NS	-	NS	-	NS	NS	Negative correlation	Positive correlation
UCS	Mutation;Structural Variant	-	Upregulate **	-	NS	-	NS	-	Positive correlation *	Positive correlation *	NS	NS
TGCT	Structural Variant	-	NS	-	NS	-	NS	-	NS	NS	NS	NS
UCEC	Mutation;Amplification;Deep Deletion	Upregulate ***	-	Upregulate ***	NS	-	NS	-	Positive correlation *	Positive correlation ***	NS	NS
UVM	-	-	-	-	NS	-	NS	-	NS	NS	NS	Positive correlation
	NS,Not significant; -, Data is not available or not included in this study; OS, Overall survival; DFS,Disease free surivial; MSI,Microsatellite instability; TMB,Tumor mutation burden; * p<0.05; ** p<0.01; *** p<0.001
